# Supplementary material for: A novel kind of coordination polymers employing 2,5-diamino-1,4-benzenedithiol as a bridging ligand: synthesis, structure, optical and magnetic properties
Source: Royal Society of Chemistry journal article supplement (doi:10.1039/c2ra20093g), 2012-01-01
Supplement: c2ra20093g.pdf [file c2ra20093g.pdf]

## Supporting information

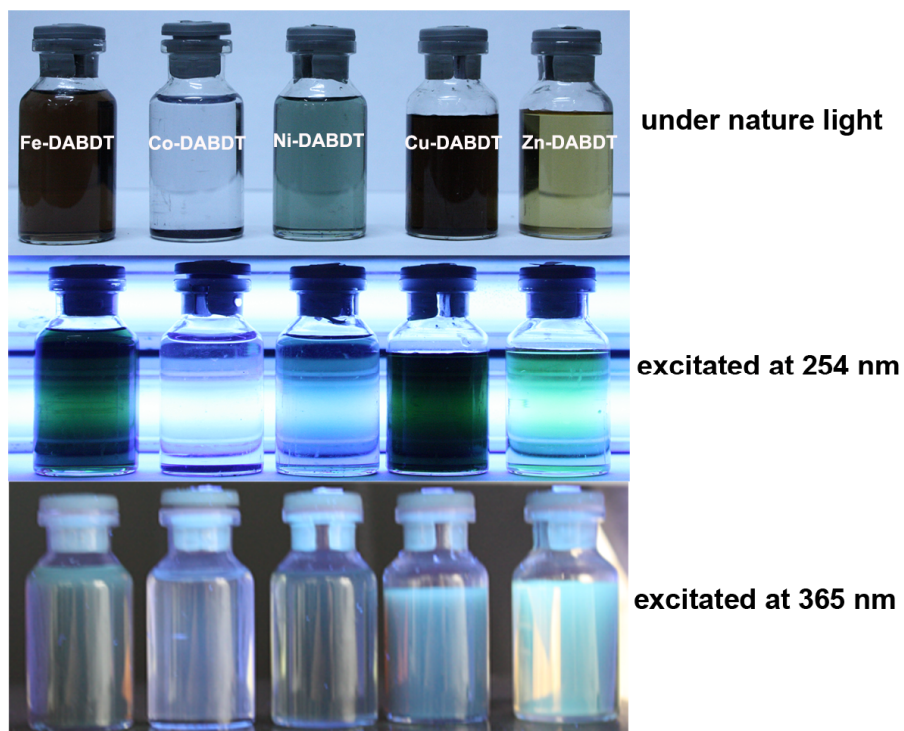

S1 Photograph of transition metal-DABDT coordination polymers in the mixed solvent of DMF and DMSO (volume ratio, 1:1)
